# Supplementary material for: Electronic structures and quantum capacitance of twisted bilayer graphene with defects based on three-band tight-binding model
Source: Royal Society of Chemistry journal article supplement (doi:10.1039/d3cp05913h), 2024-01-01
Supplement: d3cp05913h1.pdf [file d3cp05913h1.pdf]

## Supplementary Information

---

### **Electronic structures and quantum capacitance of twisted bilayer graphene with defects based on three-band tight-binding model**

Baojuan Xin<sup>a</sup>, Kaixin Zou<sup>a</sup>, Dayong Liu<sup>b</sup>, Boyan Li<sup>c</sup>, Hong Dong<sup>a</sup>, Yahui Cheng<sup>a</sup>, Hui Liu<sup>a</sup>,  
Liang-Jian Zou<sup>d</sup>, Feng Luo<sup>e</sup>, Feng Lu<sup>a,\*</sup>, Wei-Hua Wang<sup>a,\*</sup>

<sup>a</sup> *Department of Electronic Science and Engineering, and Tianjin Key Laboratory of Efficient Utilization of Solar Energy, Nankai University, Tianjin 300350, China*

<sup>b</sup> *Department of Physics, School of Sciences, Nantong University, Nantong 226019, China*

<sup>c</sup> *National Institute of Clean-and-Low-Carbon Energy, and Beijing Engineering Research Center of Nano-structured Thin Film Solar Cells, Beijing 102211, China*

<sup>d</sup> *Key Laboratory of Materials Physics, Institute of Solid State Physics, HFIPS, Chinese Academy of Sciences, Hefei 230031, China*

<sup>e</sup> *School of Materials Science and Engineering, Nankai University, Tianjin 300350, China*

\* Authors to whom correspondence should be addressed: [lufeng@nankai.edu.cn](mailto:lufeng@nankai.edu.cn);

[whwangnk@nankai.edu.cn](mailto:whwangnk@nankai.edu.cn)

1. Side view and partial density of states of C atoms with next-nearest neighboring C vacancies in 4×4 graphene supercell

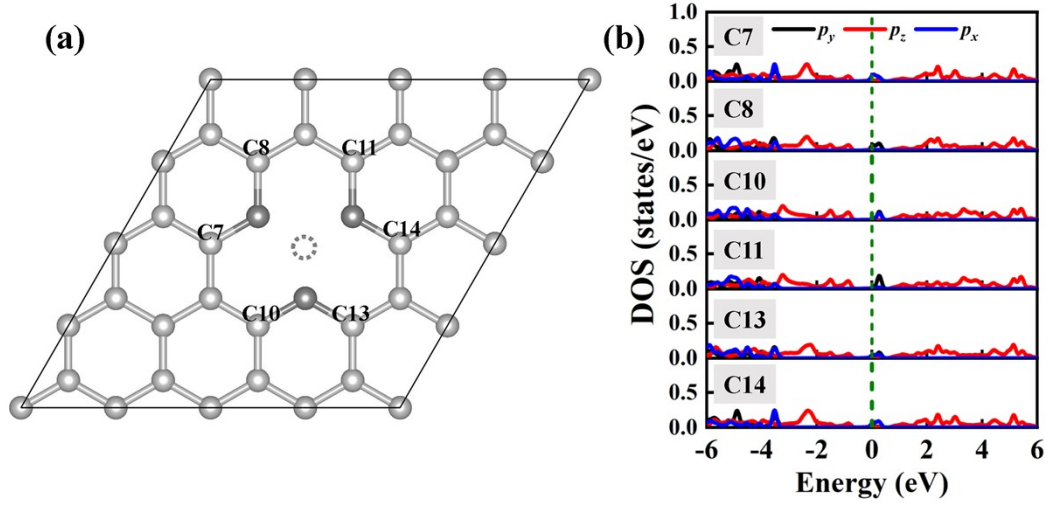

Fig. S1 (a) Side view of graphene supercell with  $V_C$ , in which the C atoms with NNN  $V_C$  are labeled as 7, 8, 11, 13 and 14. (b) PDOS of C atoms with NNN  $V_C$ .

2. The configurations and electronic structures of tBLG with three types of randomly and one type of uniformly distributed C vacancies

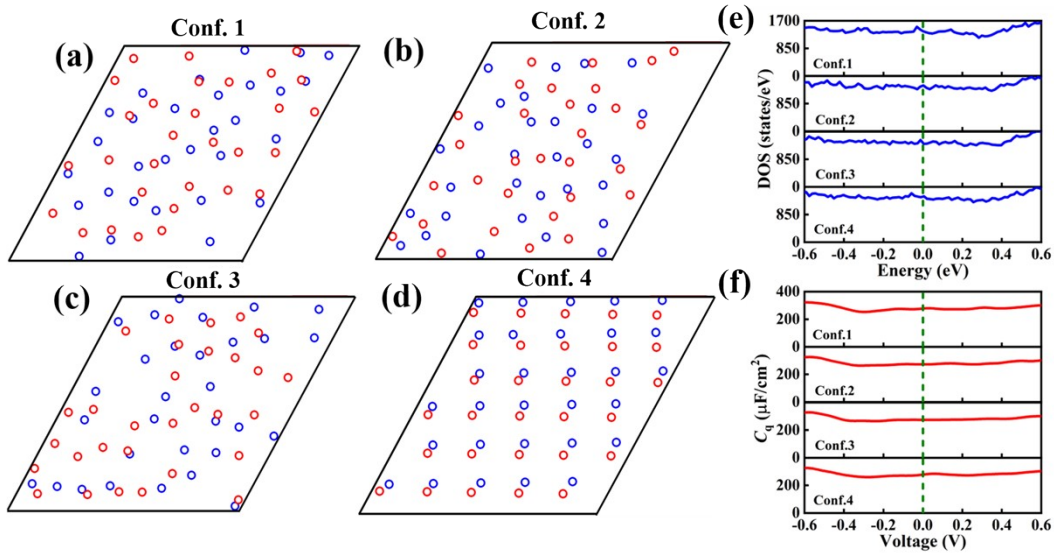

Fig. S2 (a), (b) and (c) Randomly distributed configurations of  $V_C$ , (d) uniformly distributed configuration of  $V_C$  in tBLG with the defect concentration of 1%. The blue and red circles represent the possible position of the  $V_C$  in the top and bottom layers, respectively. Here, the criterion is that the distance between two possible  $V_C$  positions is larger than  $4a$ , where  $a$  denotes the lattice constant of graphene. (e) The DOS and (f) quantum capacitance of four  $V_C$  configurations in (a-d) of tBLG with the defect concentration of 1%, where blue and red lines represent DOS and quantum capacitance respectively.

3. Zoomed in band structures of tBLG with C vacancies

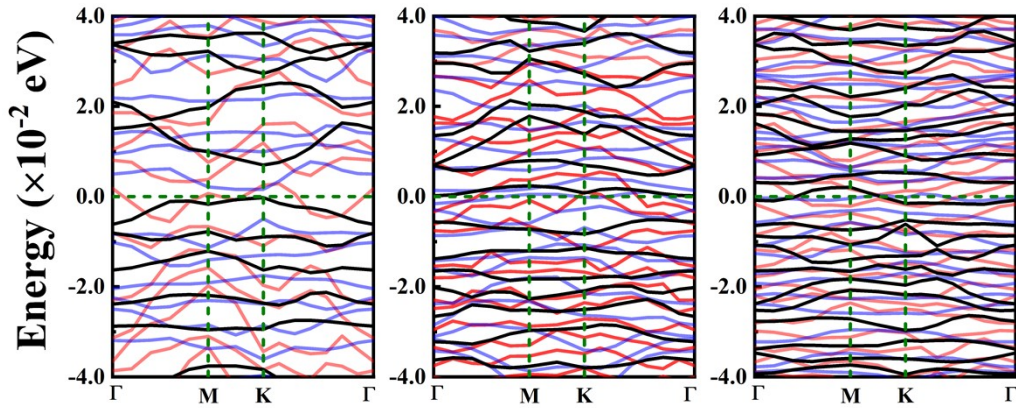

Fig. S3 Zoomed in band structures of tBLG with three-band tight binding model at the C vacancies concentration of 1%, 2% and 3% with the uniformly distributed vacancy configurations.

4. The DOS and quantum capacitance of BLG and tBLG with 0% and 2% C vacancies

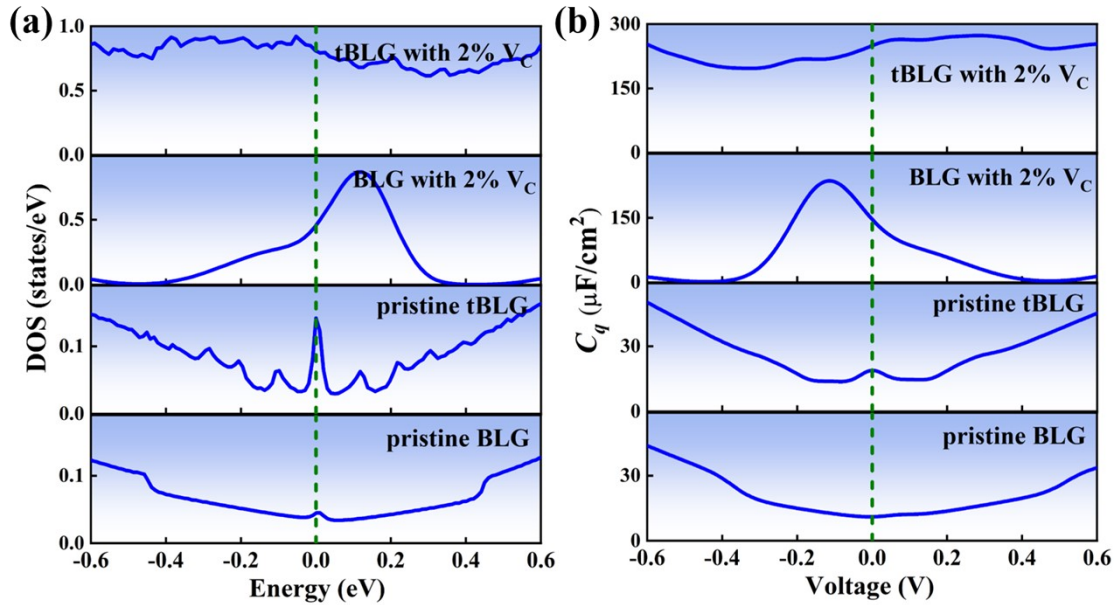

Fig. S4 Density of states corresponding to pristine BLG unit cell size in (a) and quantum capacitance in (b) of pristine BLG, pristine tBLG, BLG with  $V_C$  concentration of 2%, and tBLG with  $V_C$  concentration of 2%, respectively.
